# Supplementary material for: The Immunoglobulin Superfamily Members syg-2 and syg-1 Regulate Neurite Development in C. elegans
Source: MDPI journal article supplement (doi:10.3390/jdb10010003), 2022-01-09
Supplement: s1 [file s1]

## Supplemental Tables

**Supplemental Table S1.** Significance testing of *syg-2* by genotype.

| ANOVA                   |                           |                        |              |         |                        |              |
|-------------------------|---------------------------|------------------------|--------------|---------|------------------------|--------------|
|                         | Df                        | Sum of Sq              | Mean of Sq   | F Value | Pr (>F)                | Significant? |
| Genotype                | 3                         | 4123                   | 1374.5       | 235.969 | $1.23 \times 10^{-14}$ | Yes          |
| Allele                  | 1                         | 3                      | 2.7          | 0.455   | 0.508                  | No           |
| Genotype&Allele         | 1                         | 11                     | 10.8         | 1.856   | 0.19                   | No           |
| Residuals               | 18                        | 105                    | 5.8          |         |                        |              |
| Tukey HSD               |                           | Padj                   | Significant? |         |                        |              |
| Genotype 1              | Genotype 2                |                        |              |         |                        |              |
| <i>wild type</i>        | <i>syg-2(lh6)</i>         | 1.00                   | No           |         |                        |              |
|                         | <i>syg-2(ky673)</i>       | 0.99                   | No           |         |                        |              |
|                         | <i>mig-5</i>              | 0.97                   | No           |         |                        |              |
|                         | <i>mig-5;syg-2(lh6)</i>   | $1.04 \times 10^{-10}$ | Yes          |         |                        |              |
|                         | <i>mig-5;syg-2(ky673)</i> | $5.21 \times 10^{-9}$  | Yes          |         |                        |              |
| <i>syg-2(lh6)</i>       | <i>syg-2(ky673)</i>       | 1.00                   | No           |         |                        |              |
|                         | <i>mig-5;syg-2(lh6)</i>   | $2.29 \times 10^{-10}$ | Yes          |         |                        |              |
|                         | <i>mig-5;syg-2(ky673)</i> | $1.13 \times 10^{-8}$  | Yes          |         |                        |              |
| <i>syg-2(ky673)</i>     | <i>mig-5;syg-2(ky673)</i> | $1.87 \times 10^{-9}$  | Yes          |         |                        |              |
| <i>mig-5</i>            | <i>syg-2(lh6)</i>         | 1.00                   | No           |         |                        |              |
|                         | <i>syg-2(ky673)</i>       | 1.00                   | No           |         |                        |              |
|                         | <i>mig-5;syg-2(lh6)</i>   | $6.48 \times 10^{-10}$ | Yes          |         |                        |              |
|                         | <i>mig-5;syg-2(ky673)</i> | $3.26 \times 10^{-8}$  | Yes          |         |                        |              |
| <i>mig-5;syg-2(lh6)</i> | <i>syg-2(ky673)</i>       | $1.05 \times 10^{-11}$ | Yes          |         |                        |              |
|                         | <i>mig-5;syg-2(ky673)</i> | 0.98                   | No           |         |                        |              |

**Supplemental Table S2.** Significance testing of *syg-1*, *syg-2*, *mig-5* and *lin-17*.

| ANOVA              |                     |                        |              |         |                      |              |
|--------------------|---------------------|------------------------|--------------|---------|----------------------|--------------|
|                    | Df                  | Sum of Sq              | Mean of Sq   | F Value | Pr (>F)              | Significant? |
| Genotype           | 8                   | $4.12 \times 10^8$     | 1912.7       | 291.3   | $<2 \times 10^{-16}$ | Yes          |
| Residuals          | 25                  | 164                    | 6.6          |         |                      |              |
| Tukey HSD          |                     |                        |              |         |                      |              |
| Genotype 1         | Genotype 2          | Padj                   | Significant? |         |                      |              |
| <i>syg-2</i>       | <i>syg-1</i>        | 1.00                   | No           |         |                      |              |
|                    | <i>syg-1syg-2</i>   | 1.00                   | No           |         |                      |              |
|                    | <i>mig-5;syg-2</i>  | $7.64 \times 10^{-13}$ | Yes          |         |                      |              |
|                    | <i>mig-5;syg-1</i>  | $3.49 \times 10^{-11}$ | Yes          |         |                      |              |
|                    | <i>lin-17</i>       | $3.67 \times 10^{-9}$  | Yes          |         |                      |              |
|                    | <i>syg-1;lin-17</i> | $3.28 \times 10^{-14}$ | Yes          |         |                      |              |
| <i>syg-1</i>       | <i>mig-5;syg-2</i>  | $1.11 \times 10^{-13}$ | Yes          |         |                      |              |
|                    | <i>mig-5;syg-1</i>  | $6.39 \times 10^{-12}$ | Yes          |         |                      |              |
|                    | <i>lin-17</i>       | $7.16 \times 10^{-10}$ | Yes          |         |                      |              |
| <i>syg-1syg-2</i>  | <i>syg-1</i>        | 1.00                   | No           |         |                      |              |
|                    | <i>mig-5;syg-2</i>  | $2.01 \times 10^{-13}$ | Yes          |         |                      |              |
|                    | <i>mig-5;syg-1</i>  | $1.40 \times 10^{-11}$ | Yes          |         |                      |              |
|                    | <i>lin-17</i>       | $1.78 \times 10^{-9}$  | Yes          |         |                      |              |
|                    | <i>syg-1;lin-17</i> | $3.28 \times 10^{-14}$ | Yes          |         |                      |              |
| <i>mig-5;syg-2</i> | <i>mig-5;syg-1</i>  | 1.00                   | No           |         |                      |              |
|                    | <i>lin-17</i>       | $4.58 \times 10^{-2}$  | Yes          |         |                      |              |
| <i>mig-5;syg-1</i> | <i>lin-17</i>       | 0.24                   | No           |         |                      |              |

|                         |                     |                        |     |
|-------------------------|---------------------|------------------------|-----|
| <i>syg-2;lin-17</i>     | <i>syg-2</i>        | $3.28 \times 10^{-14}$ | Yes |
|                         | <i>syg-1</i>        | $3.28 \times 10^{-14}$ | Yes |
|                         | <i>syg-1syg-2</i>   | $3.28 \times 10^{-14}$ | Yes |
|                         | <i>mig-5;syg-2</i>  | $1.06 \times 10^{-9}$  | Yes |
|                         | <i>mig-5;syg-1</i>  | $9.21 \times 10^{-9}$  | Yes |
|                         | <i>lin-17</i>       | $7.70 \times 10^{-11}$ | Yes |
|                         | <i>syg-1;lin-17</i> | $4.70 \times 10^{-2}$  | Yes |
| <i>syg-1;lin-17</i>     | <i>syg-1</i>        | $3.28 \times 10^{-14}$ | Yes |
|                         | <i>mig-5;syg-2</i>  | $3.09 \times 10^{-13}$ | Yes |
|                         | <i>mig-5;syg-1</i>  | $6.21 \times 10^{-12}$ | Yes |
|                         | <i>lin-17</i>       | $1.49 \times 10^{-13}$ | Yes |
| <i>syg-2syg-1;lin17</i> | <i>syg-2</i>        | $3.28 \times 10^{-14}$ | Yes |
|                         | <i>syg-1</i>        | $3.28 \times 10^{-14}$ | Yes |
|                         | <i>syg-1syg-2</i>   | $3.28 \times 10^{-14}$ | Yes |
|                         | <i>mig-5;syg-2</i>  | $1.73 \times 10^{-12}$ | Yes |
|                         | <i>mig-5;syg-1</i>  | $3.61 \times 10^{-11}$ | Yes |
|                         | <i>lin-17</i>       | $5.33 \times 10^{-13}$ | Yes |
|                         | <i>syg-2;lin-17</i> | 0.36                   | No  |
|                         | <i>syg-1;lin-17</i> | 0.96                   | No  |

**Supplemental Table S3.** Significance testing of L1 vs. adult.

| ANOVA                    |     |           |                        |              |                        |              |
|--------------------------|-----|-----------|------------------------|--------------|------------------------|--------------|
|                          | Df  | Sum of Sq | Mean of Sq             | F value      | Pr (>F)                | Significant? |
| Genotype                 | 21  | 53843     | 2564                   | 51.23        | $2.00 \times 10^{-16}$ | Yes          |
| Stage                    | 1   | 1752      | 1752.1                 | 35.01        | $2.00 \times 10^{-16}$ | Yes          |
| Genotype&Stage           | 18  | 5139      | 285.5                  | 26.41        | $2.00 \times 10^{-16}$ | Yes          |
| Residuals                | 108 | 1168      | 10.8                   |              |                        |              |
| Tukey HSD                |     |           |                        |              |                        |              |
| Genotype                 |     | Stage     | <i>p</i> (adjusted)    | Significant? |                        |              |
| <i>wild-type</i>         | L1  | Adult     | 1.00                   | No           |                        |              |
| <i>syg-2</i>             | L1  | Adult     | 1.00                   | No           |                        |              |
| <i>syg-1</i>             | L1  | Adult     | 1.00                   | No           |                        |              |
| <i>syg-1syg-2</i>        | L1  | Adult     | 1.00                   | No           |                        |              |
| <i>mig-5</i>             | L1  | Adult     | 1.00                   | No           |                        |              |
| <i>mig-5;syg-2</i>       | L1  | Adult     | 1.00                   | No           |                        |              |
| <i>mig-5;syg-1</i>       | L1  | Adult     | 1.00                   | No           |                        |              |
| <i>lin-17</i>            | L1  | Adult     | $6.52 \times 10^{-11}$ | Yes          |                        |              |
| <i>syg-2;lin-17</i>      | L1  | Adult     | 1.00                   | No           |                        |              |
| <i>syg-1;lin-17</i>      | L1  | Adult     | 1.00                   | No           |                        |              |
| <i>syg-2syg-1;lin-17</i> | L1  | Adult     | 1.00                   | No           |                        |              |
| <i>fmi-1</i>             | L1  | Adult     | 1.00                   | No           |                        |              |
| <i>mig-5;fmi-1</i>       | L1  | Adult     | $2.63 \times 10^{-12}$ | Yes          |                        |              |
| <i>fmi-1;syg-2</i>       | L1  | Adult     | 1.00                   | No           |                        |              |
| <i>fmi-1;mig-5;syg-2</i> | L1  | Adult     | 0.20                   | No           |                        |              |
| <i>fmi-1;syg-1</i>       | L1  | Adult     | 1.00                   | No           |                        |              |
| <i>fmi-1;mig-5;syg-1</i> | L1  | Adult     | $2.60 \times 10^{-11}$ | Yes          |                        |              |
| <i>lin-17;fmi-1</i>      | L1  | Adult     | $1.15 \times 10^{-14}$ | Yes          |                        |              |
| <i>dsh-1</i>             | L1  | Adult     | 1.00                   | No           |                        |              |
